# Supplementary material for: Reactivity of diatomics and of ethylene on zeolite-supported 13-atom platinum nanoclusters
Source: Royal Society of Chemistry journal article supplement (doi:10.1039/c6cy00182c), 2016-01-01
Supplement: c6cy00182c1.pdf [file c6cy00182c1.pdf]

## Electronic supporting information

### Reactivity of Diatomics and of Ethylene on Zeolite-Supported 13-Atom Platinum Nanoclusters

Melanie Keppeler,<sup>†,1</sup> Gabriele Bräuning,<sup>†</sup> Shankara Gayathri Radhakrishnan,<sup>‡</sup> Xiong Liu,<sup>†2</sup> Christopher Jensen<sup>†3</sup> and Emil Roduner<sup>†‡\*</sup>

<sup>†</sup> Institut für Physikalische Chemie, Universität Stuttgart,  
Pfaffenwaldring 55, D-70569 Stuttgart, Germany

<sup>‡</sup> Department of Chemistry, University of Pretoria, Pretoria 0002, Republic of South Africa

\*Corresponding author: [e.roduner@ipc.uni-stuttgart.de](mailto:e.roduner@ipc.uni-stuttgart.de)

<sup>1</sup> Present address: Eichenweg 5c, D-89290 Buch, Germany

<sup>2</sup> Present address: Faculty of Materials Science and Engineering, Hubei University,  
No. 368 Youyi Avenue, Wuchang, Wuhan 430062, China

<sup>3</sup> Present address: ThyssenKrupp Industrial Solutions AG, Business Unit Process Technologies,  
Neubeckumer Straße 127, D-59320 Ennigerloh, Germany

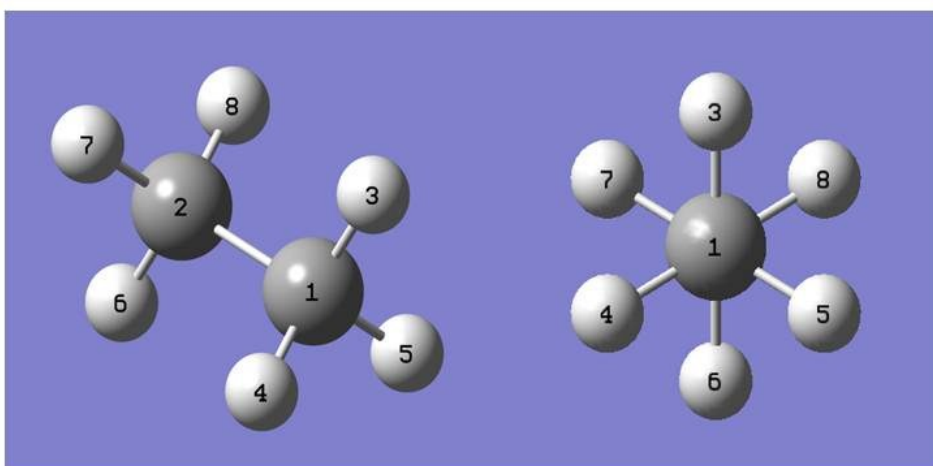

**Figure S1:** Numbering Scheme of ethane molecule. All isotopomers were calculated for staggered conformations (back rotor rotated by  $60^\circ$  with respect to front rotor). Eclipsed conformations exhibited negative frequencies for the lowest frequency (internal rotation) mode.

**Table S1:** Calculated intensities for various isotopologues in different conformations for the ethane product

| Isotopologue                                    | Conformation | Vibrational frequency<br>/ cm <sup>-1</sup> | Intensity |
|-------------------------------------------------|--------------|---------------------------------------------|-----------|
| CH <sub>3</sub> -CH <sub>3</sub>                | staggered    | 307.22                                      | 0.0000    |
|                                                 |              | 826.26                                      | 3.6934    |
|                                                 |              | 826.26                                      | 3.9634    |
|                                                 |              | 994.71                                      | 0.0000    |
|                                                 |              | 1220.84                                     | 0.0000    |
|                                                 |              | 1220.85                                     | 0.0000    |
|                                                 |              | 1412.54                                     | 0.9735    |
|                                                 |              | 1422.11                                     | 0.0000    |
|                                                 |              | 1502.94                                     | 0.0000    |
|                                                 |              | 1502.94                                     | 0.0000    |
|                                                 |              | 1505.73                                     | 9.1539    |
|                                                 |              | 1505.73                                     | 9.1539    |
|                                                 |              | 3025.71                                     | 0.0000    |
|                                                 |              | 3026.16                                     | 59.5319   |
|                                                 |              | 3071.27                                     | 0.0000    |
|                                                 |              | 3071.27                                     | 0.0000    |
| 3096.26                                         | 62.8088      |                                             |           |
| 3096.26                                         | 62.7977      |                                             |           |
| CH <sub>2</sub> D-CH <sub>3</sub><br>Atom 5 = D | staggered    | 288.30                                      | 0.0013    |
|                                                 |              | 718.67                                      | 2.2116    |
|                                                 |              | 810.58                                      | 3.9376    |
|                                                 |              | 979.98                                      | 0.2446    |
|                                                 |              | 1138.52                                     | 0.7438    |
|                                                 |              | 1183.73                                     | 0.1900    |
|                                                 |              | 1326.64                                     | 1.3827    |
|                                                 |              | 1335.09                                     | 2.4385    |
|                                                 |              | 1417.49                                     | 0.4589    |
|                                                 |              | 1481.43                                     | 3.0084    |
|                                                 |              | 1504.22                                     | 6.0828    |
|                                                 |              | 1504.29                                     | 4.4416    |
|                                                 |              | 2246.51                                     | 14.9967   |
|                                                 |              | 3025.93                                     | 29.3394   |
| 3045.25                                         | 23.5320      |                                             |           |
| 3071.07                                         | 0.0011       |                                             |           |

|                                                      |               |         |         |
|------------------------------------------------------|---------------|---------|---------|
|                                                      |               | 3085.36 | 38.9545 |
|                                                      |               | 3096.12 | 62.5433 |
| CH <sub>2</sub> D-CH <sub>2</sub> D<br>Atoms 5,7 = D | D-D staggered | 268.37  | 0.0013  |
|                                                      |               | 637.45  | 1.9366  |
|                                                      |               | 749.04  | 3.0521  |
|                                                      |               | 972.74  | 0.3755  |
|                                                      |               | 1062.60 | 1.0520  |
|                                                      |               | 1137.59 | 0.7477  |
|                                                      |               | 1301.71 | 1.3737  |
|                                                      |               | 1309.68 | 0.3576  |
|                                                      |               | 1338.71 | 3.4294  |
|                                                      |               | 1350.42 | 2.5363  |
|                                                      |               | 1478.97 | 2.2963  |
|                                                      |               | 1484.59 | 6.4313  |
|                                                      |               | 2243.39 | 16.3973 |
|                                                      |               | 2249.58 | 13.6002 |
|                                                      |               | 3043.63 | 38.9012 |
|                                                      |               | 3047.47 | 10.3005 |
|                                                      |               | 3078.71 | 22.9714 |
|                                                      |               | 3094.72 | 51.4465 |
| CH <sub>2</sub> D-CH <sub>2</sub> D<br>Atoms 5,7 = D | D-D anti      | 267.38  | 0.0046  |
|                                                      |               | 662.01  | 1.8646  |
|                                                      |               | 796.87  | 4.1357  |
|                                                      |               | 909.90  | 0.0000  |
|                                                      |               | 1071.14 | 0.0000  |
|                                                      |               | 1153.04 | 0.0000  |
|                                                      |               | 1302.20 | 3.4952  |
|                                                      |               | 1310.88 | 5.0261  |
|                                                      |               | 1339.11 | 0.0000  |
|                                                      |               | 1351.06 | 0.0000  |
|                                                      |               | 1478.41 | 0.0000  |
|                                                      |               | 1485.14 | 9.0212  |
|                                                      |               | 2242.73 | 0.0000  |
|                                                      |               | 2250.19 | 30.7581 |
|                                                      |               | 3042.00 | 0.0000  |
|                                                      |               | 3051.58 | 60.6113 |
|                                                      |               | 3070.88 | 0.0000  |
|                                                      |               | 3095.98 | 62.2889 |
| CHD <sub>2</sub> -CH <sub>3</sub><br>Atoms 4,5 = D   | staggered     | 275.43  | 0.0007  |
|                                                      |               | 687.91  | 2.0985  |

|                                                       |               |         |         |
|-------------------------------------------------------|---------------|---------|---------|
|                                                       |               | 741.58  | 2.9254  |
|                                                       |               | 948.63  | 0.6783  |
|                                                       |               | 1100.86 | 1.3484  |
|                                                       |               | 1132.35 | 0.8107  |
|                                                       |               | 1142.74 | 0.3593  |
|                                                       |               | 1329.97 | 4.3955  |
|                                                       |               | 1331.01 | 0.8364  |
|                                                       |               | 1417.51 | 0.4335  |
|                                                       |               | 1503.32 | 4.9948  |
|                                                       |               | 1503.94 | 4.5055  |
|                                                       |               | 2209.71 | 14.9540 |
|                                                       |               | 2284.76 | 14.9397 |
|                                                       |               | 3025.93 | 29.6458 |
|                                                       |               | 3060.79 | 11.1281 |
|                                                       |               | 3083.91 | 32.0227 |
|                                                       |               | 3088.60 | 51.1283 |
| CH <sub>2</sub> D-CHD <sub>2</sub><br>Atoms 5,6,8 = D | H-D staggered | 253.87  | 0.0026  |
|                                                       |               | 637.52  | 1.7756  |
|                                                       |               | 725.65  | 3.0357  |
|                                                       |               | 903.51  | 0.1650  |
|                                                       |               | 1032.51 | 0.7958  |
|                                                       |               | 1094.97 | 0.6166  |
|                                                       |               | 1122.14 | 1.2213  |
|                                                       |               | 1296.96 | 1.7922  |
|                                                       |               | 1321.15 | 3.1804  |
|                                                       |               | 1331.50 | 3.1626  |
|                                                       |               | 1350.76 | 1.4002  |
|                                                       |               | 1481.68 | 4.6317  |
|                                                       |               | 2209.69 | 14.8563 |
|                                                       |               | 2245.77 | 12.8782 |
|                                                       |               | 2285.40 | 17.9560 |
|                                                       |               | 3046.17 | 22.3305 |
|                                                       |               | 3062.37 | 22.1663 |
|                                                       |               | 3087.36 | 47.9358 |
| CH <sub>2</sub> D-CHD <sub>2</sub><br>Atoms 5,6,8 = D | H-D anti      | 254.55  | 0.0001  |
|                                                       |               | 660.77  | 2.0580  |
|                                                       |               | 678.75  | 2.2427  |
|                                                       |               | 947.96  | 0.6605  |
|                                                       |               | 1028.78 | 0.3809  |
|                                                       |               | 1099.15 | 1.2643  |

|                                                     |           |         |         |
|-----------------------------------------------------|-----------|---------|---------|
|                                                     |           | 1102.16 | 1.4740  |
|                                                     |           | 1305.97 | 0.2502  |
|                                                     |           | 1315.94 | 0.0082  |
|                                                     |           | 1337.11 | 6.9191  |
|                                                     |           | 1339.68 | 2.2151  |
|                                                     |           | 1481.69 | 4.3513  |
|                                                     |           | 2209.19 | 15.3365 |
|                                                     |           | 2246.95 | 14.5722 |
|                                                     |           | 2284.85 | 14.9863 |
|                                                     |           | 3044.85 | 28.9238 |
|                                                     |           | 3067.58 | 32.5204 |
|                                                     |           | 3083.58 | 31.7395 |
| CH <sub>3</sub> -CD <sub>3</sub><br>Atoms 3,4,5 = D | staggered | 266.29  | 0.0000  |
|                                                     |           | 681.86  | 2.2972  |
|                                                     |           | 681.86  | 2.2980  |
|                                                     |           | 907.31  | 0.0346  |
|                                                     |           | 1082.87 | 2.8191  |
|                                                     |           | 1082.87 | 2.8204  |
|                                                     |           | 1132.95 | 0.4701  |
|                                                     |           | 1132.95 | 0.4702  |
|                                                     |           | 1135.16 | 0.4019  |
|                                                     |           | 1417.41 | 0.4455  |
|                                                     |           | 1503.08 | 4.6843  |
|                                                     |           | 1503.09 | 4.6867  |
|                                                     |           | 2174.08 | 14.9609 |
|                                                     |           | 2284.72 | 14.8528 |
|                                                     |           | 2284.72 | 14.8495 |
|                                                     |           | 3025.93 | 29.7367 |
|                                                     |           | 3083.91 | 32.0404 |
|                                                     |           | 3083.91 | 32.0348 |
| CD <sub>3</sub> -CD <sub>3</sub>                    | staggered | 217.32  | 0.0000  |
|                                                     |           | 597.15  | 1.8775  |
|                                                     |           | 597.15  | 1.8781  |
|                                                     |           | 845.32  | 0.0000  |
|                                                     |           | 979.97  | 0.0000  |
|                                                     |           | 979.97  | 0.0000  |
|                                                     |           | 1074.77 | 0.0000  |
|                                                     |           | 1074.77 | 0.0000  |
|                                                     |           | 1079.52 | 0.7536  |
|                                                     |           | 1091.55 | 5.7504  |

|  |  |         |         |
|--|--|---------|---------|
|  |  | 1091.56 | 5.7531  |
|  |  | 1163.92 | 0.0000  |
|  |  | 2171.32 | 29.9004 |
|  |  | 2176.80 | 0.0000  |
|  |  | 2276.90 | 0.0000  |
|  |  | 2276.90 | 0.0000  |
|  |  | 2292.41 | 31.0437 |
|  |  | 2292.41 | 31.0370 |
